# Supplementary material for: An autoregulatory cell cycle timer integrates growth and specification in chick wing digit development
Source: eLife journal article supplement (doi:10.7554/elife.47625), 2019-09-23
Supplement: supp [file elife_poa_e47625_Figure_6_source_data_1.docx]

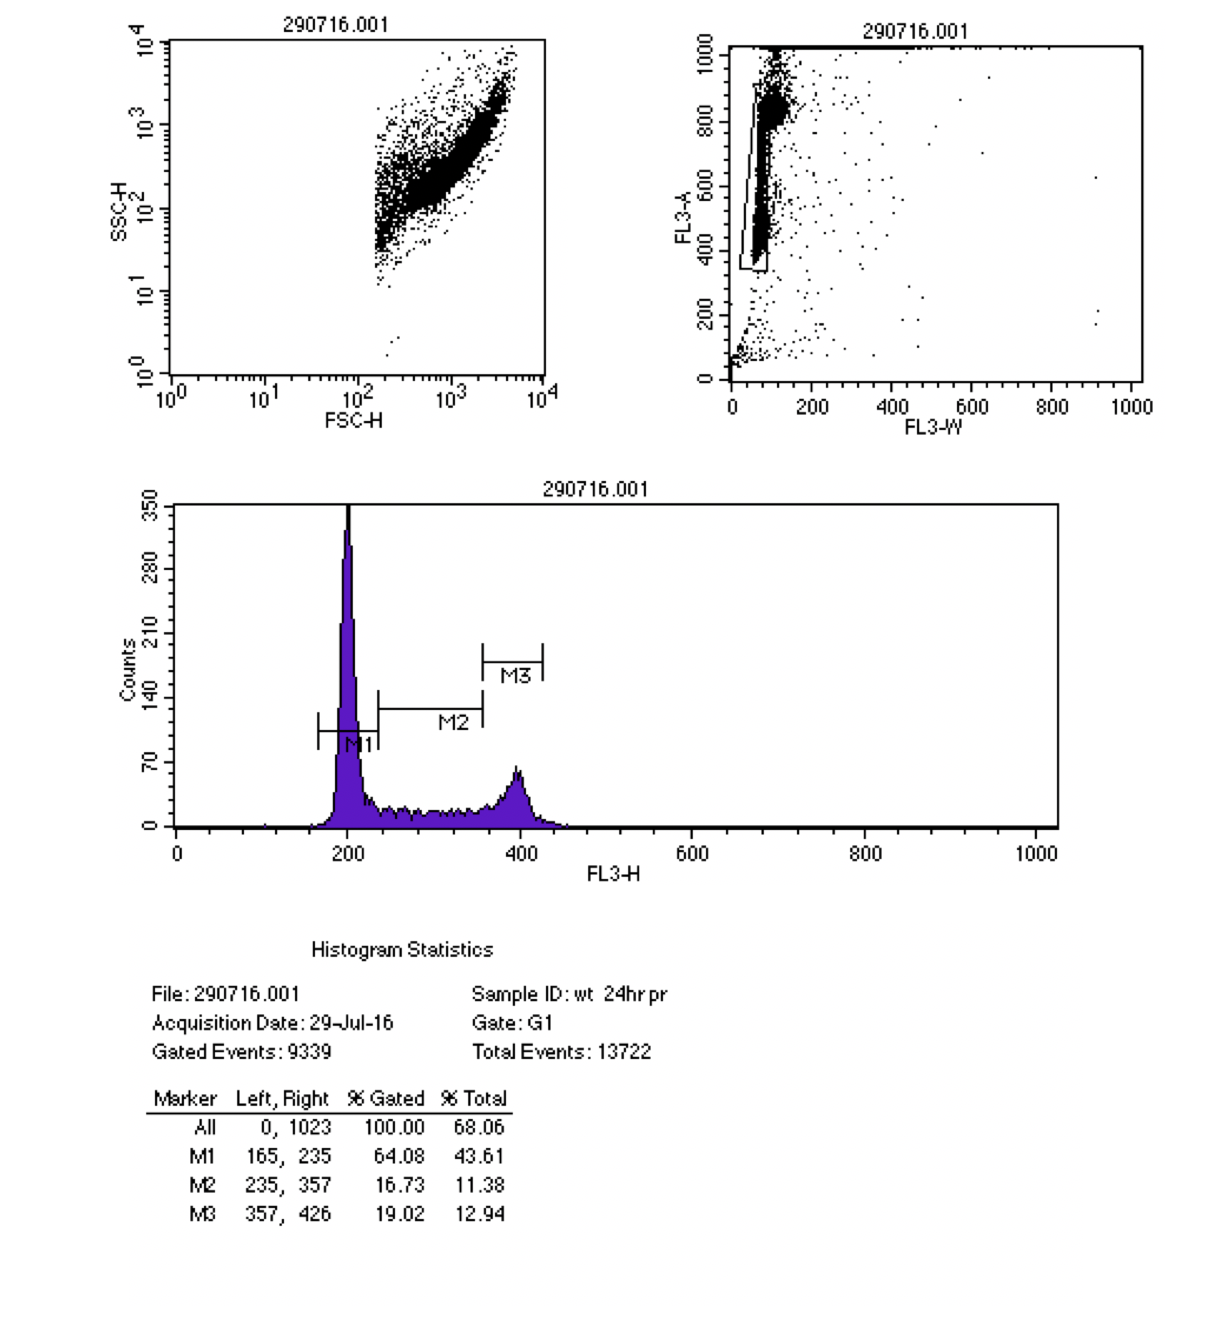


Fig. 6-source data 1 HBC/PBS 24h


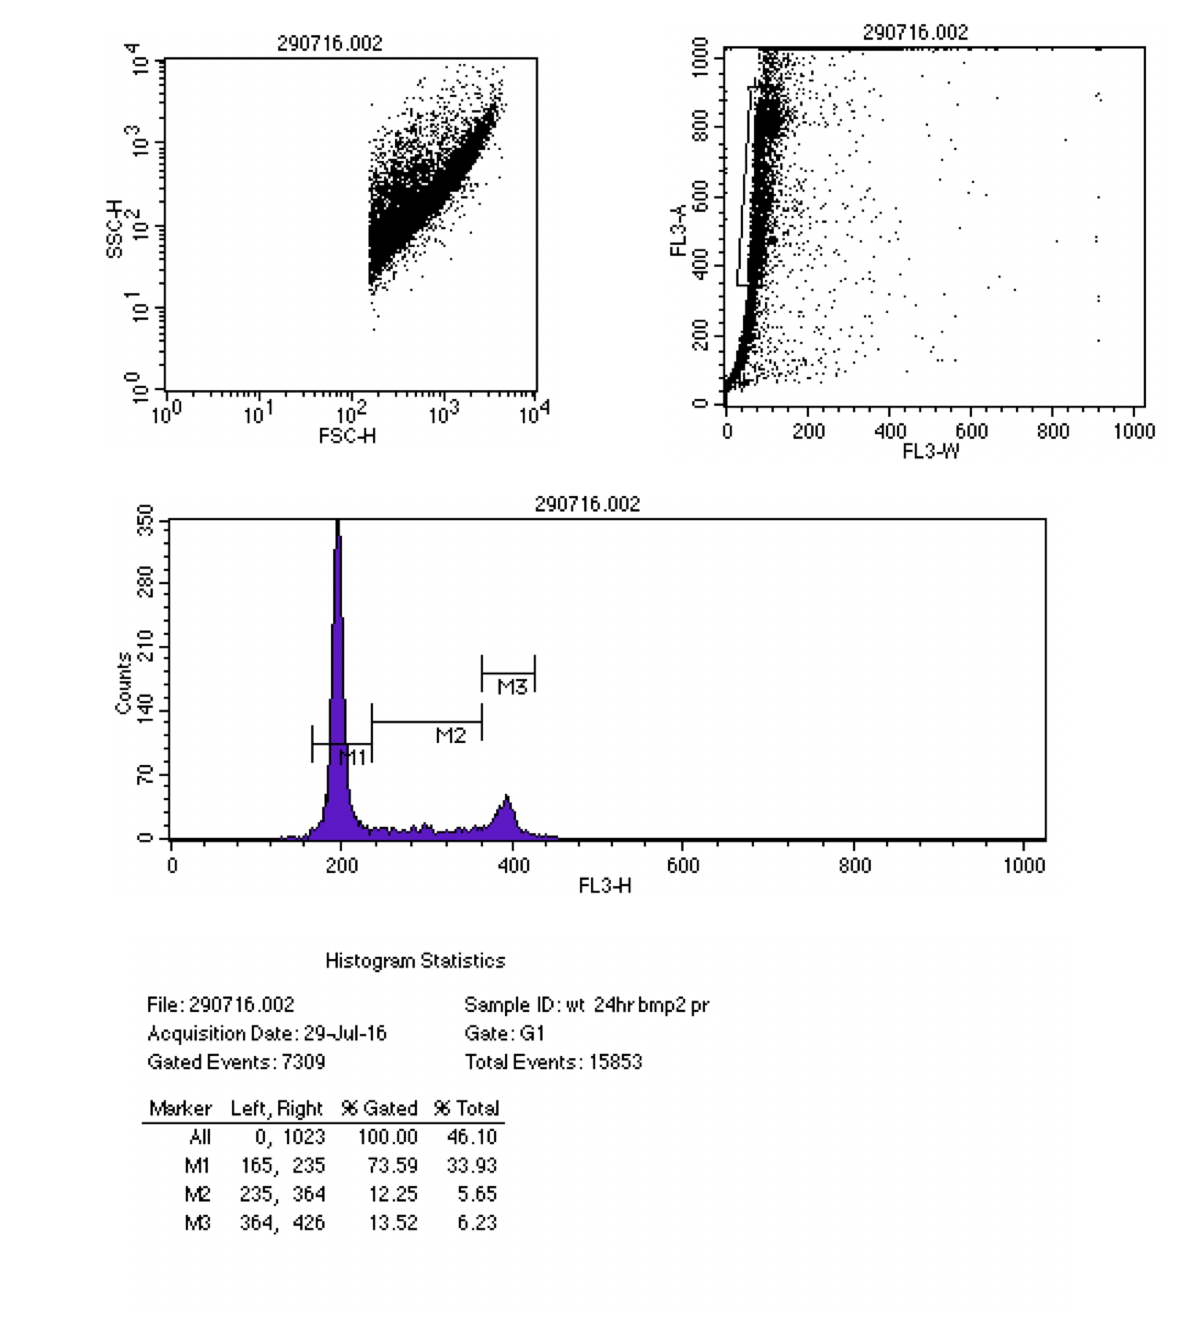


Fig. 6-source data 2 HBC/Bmp2 24h


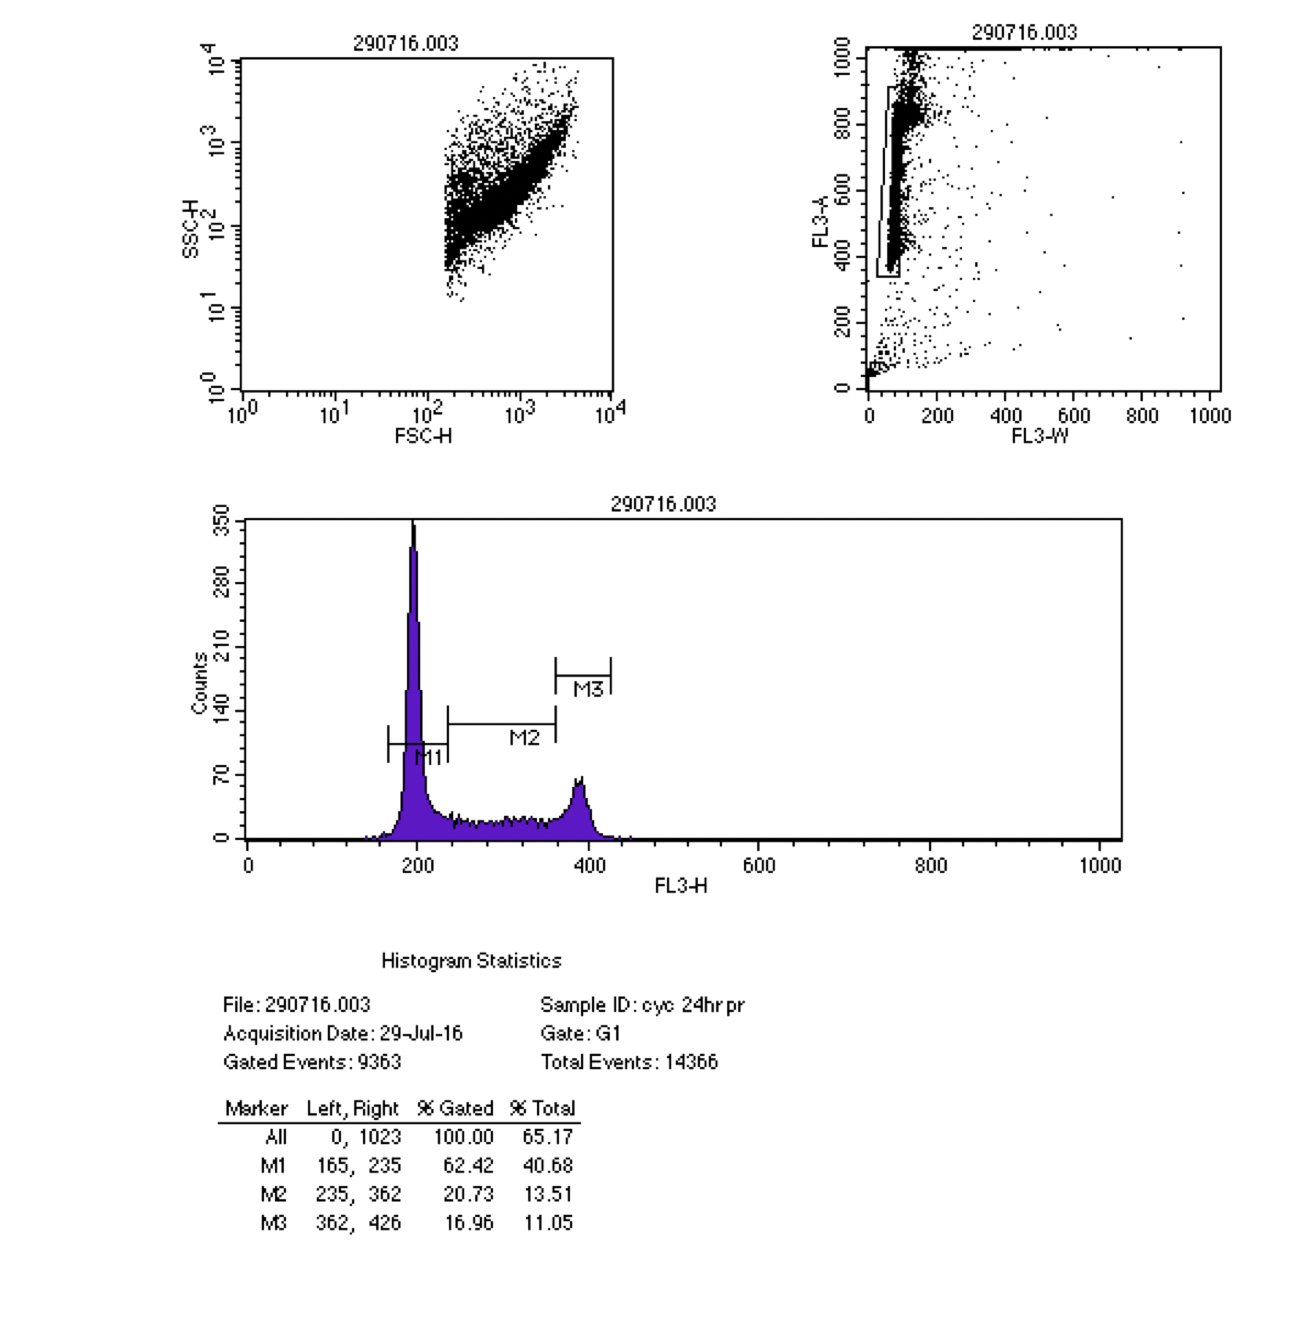


Fig. 6-source data 3 Cyc/PBS 24h


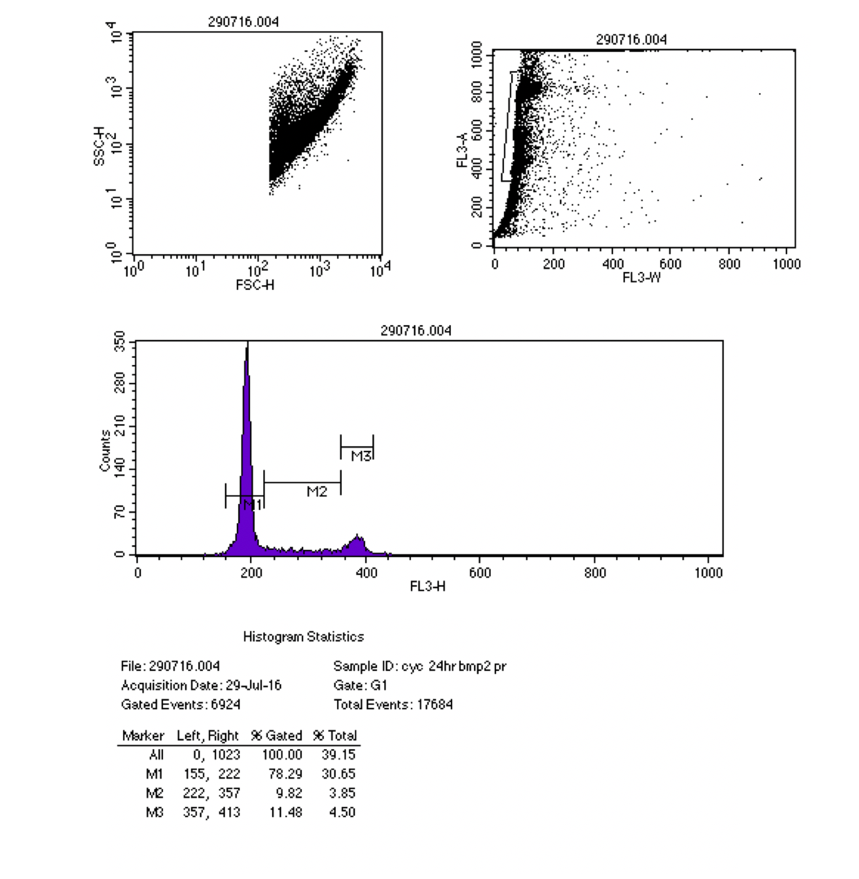


Fig. 6-source data 4 Cyc/Bmp2 24h


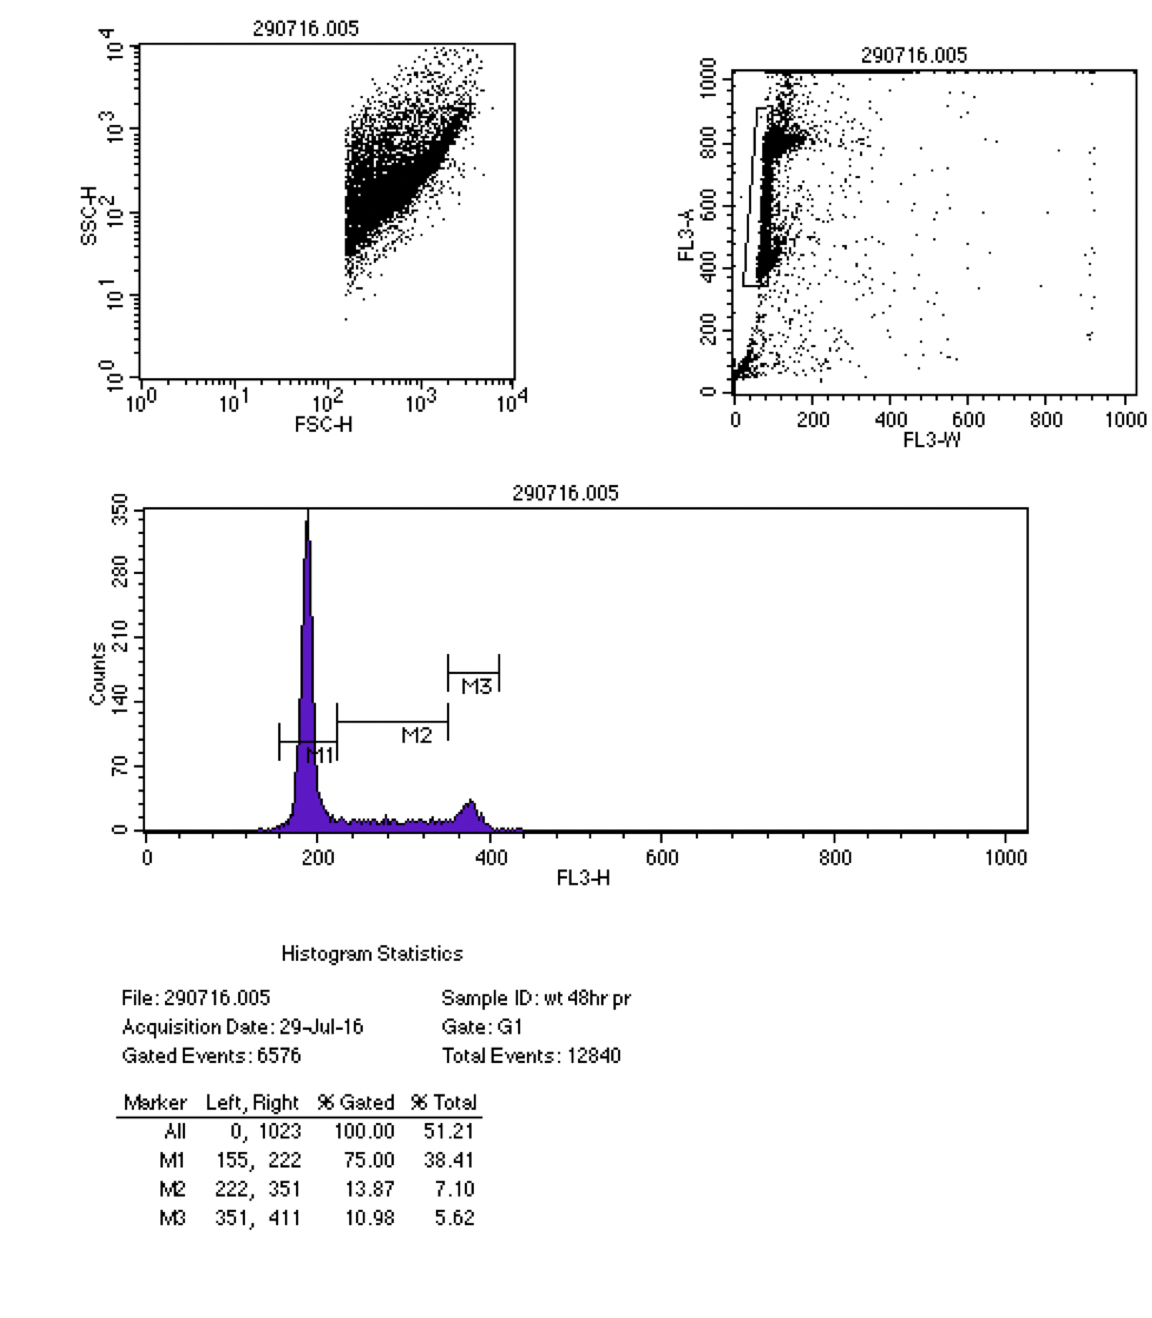


Fig. 6-source data 5 HBC/PBS 48h


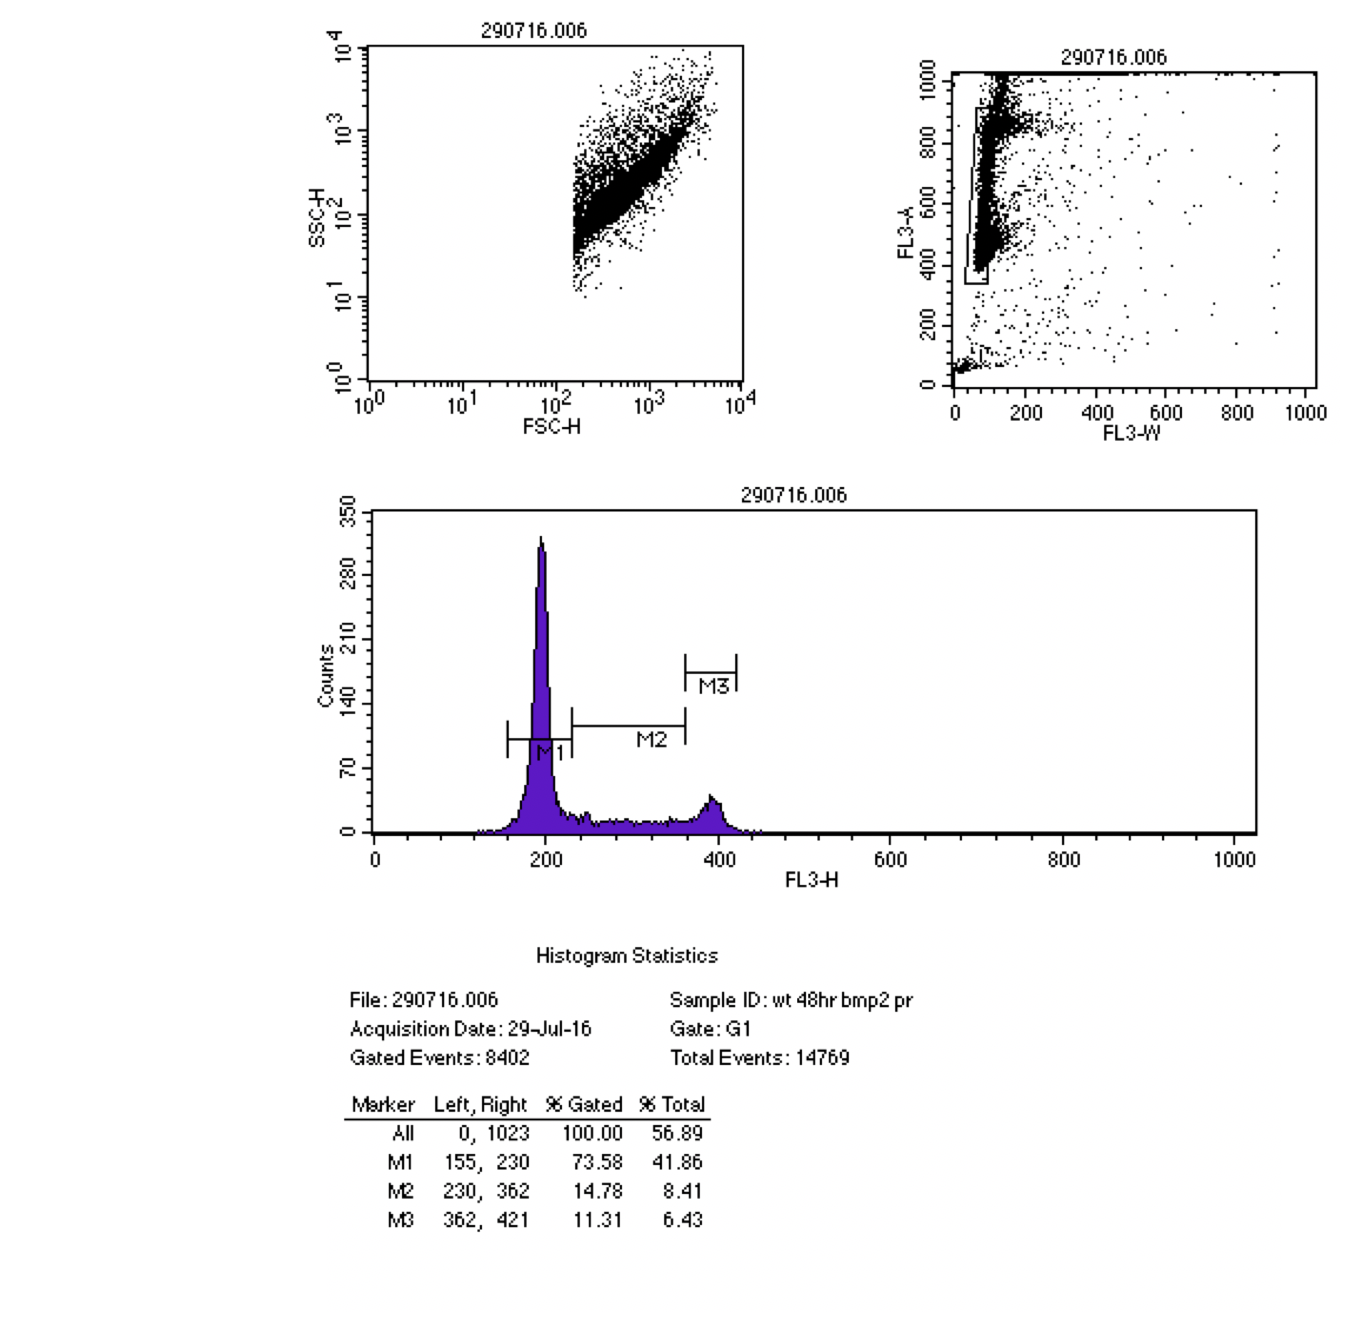


Fig. 6-source data 6 HBC/Bmp2 48 h


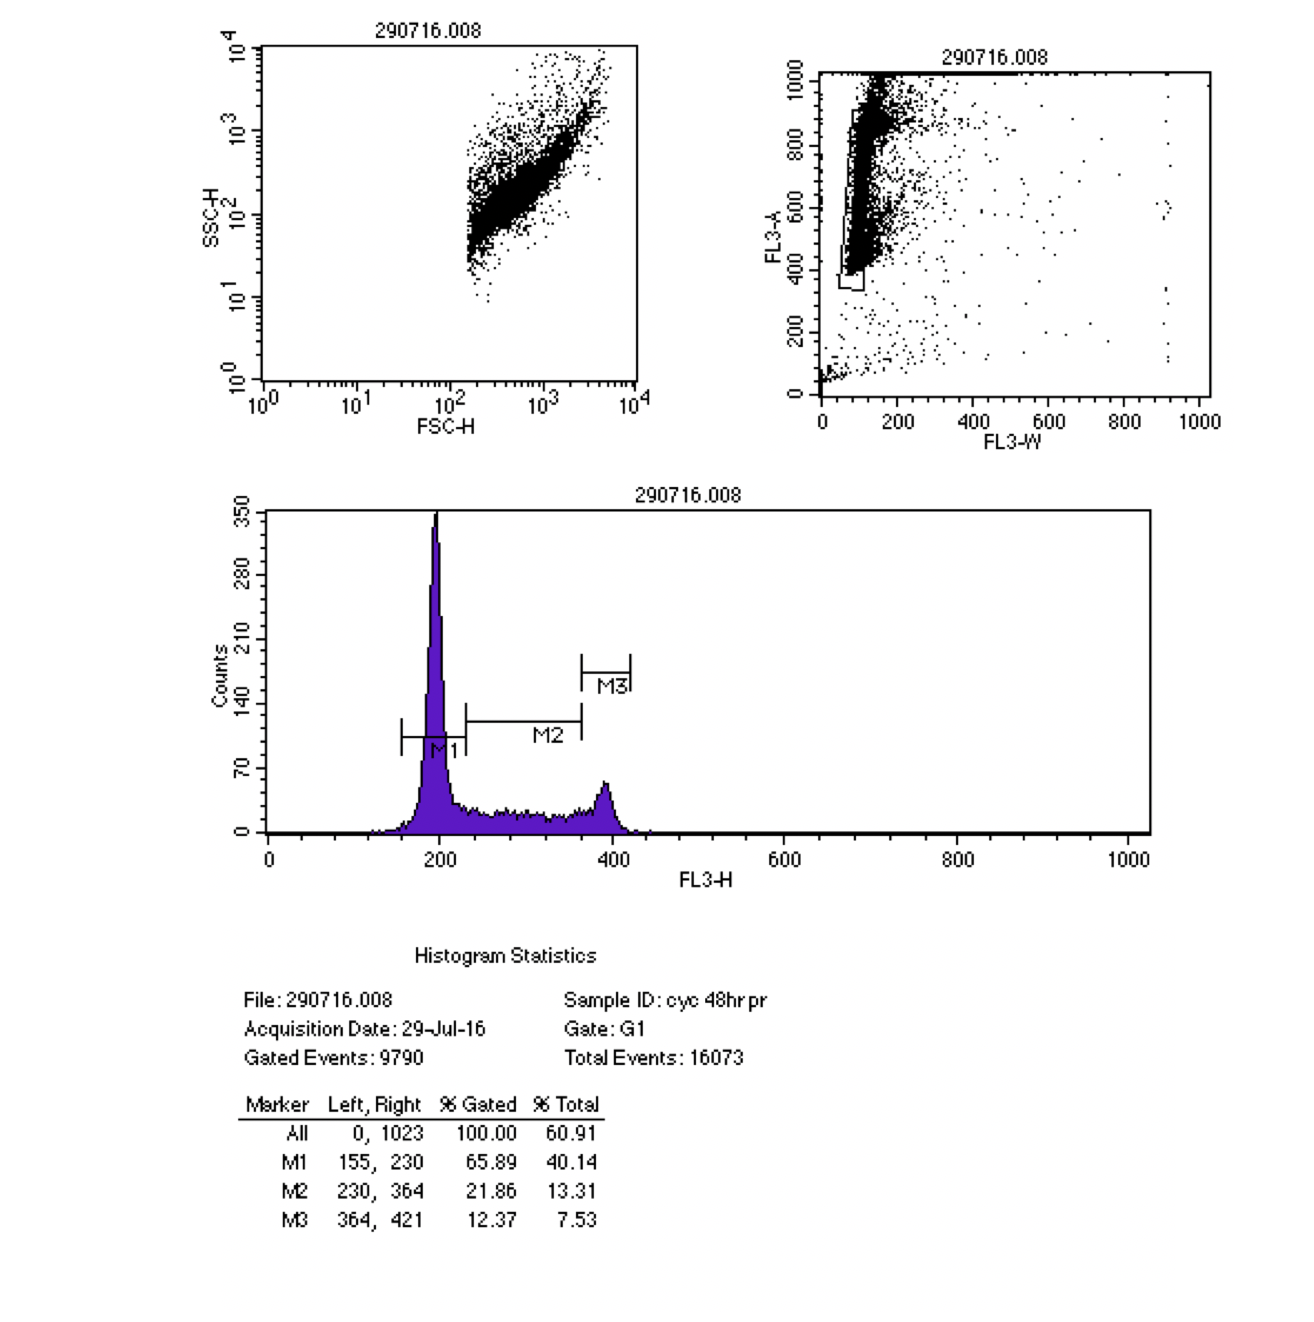


Fig. 6-source data 7 Cyc/PBS 48h


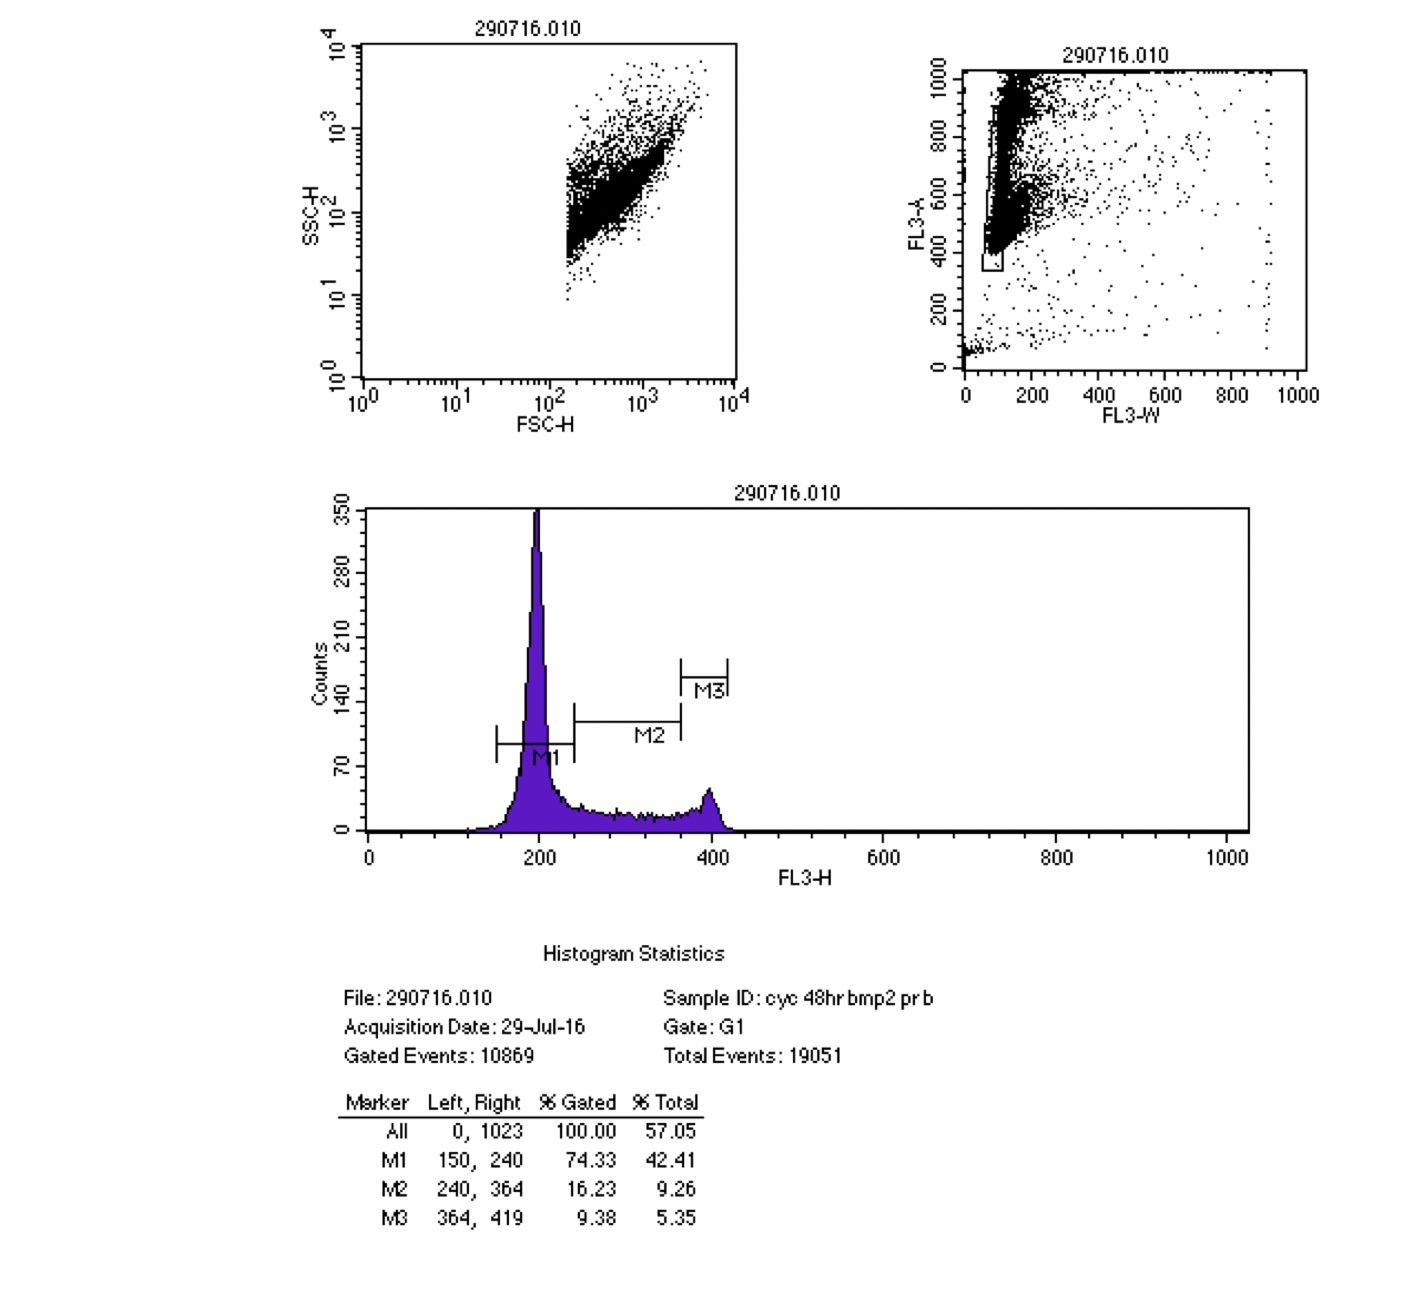


Fig. 6-source data 8 Cyc/Bmp2 48h
